# Supplementary material
Source: HighWire-hosted journal article supplement (https://www.cmajopen.ca/highwire/filestream/81270/field_highwire_adjunct_files/0/2019-0195-1-at.pdf)
Supplement: 2019-0195-1-at.pdf [file 2019-0195-1-at.pdf]

**Appendix 1 (as supplied by the authors): Temporal trend in diabetes during pregnancy among First Nations women compared to the other population. 2002-2014\*. Rates are age-standardized per 1000 women**

|                                      | 2002                  | 2003                   | 2004                   | 2005                   | 2006                  | 2007                   | 2008                  | 2009                   | 2010                   | 2011                   | 2012                   | 2013                   | 2014                    | P for trend |
|--------------------------------------|-----------------------|------------------------|------------------------|------------------------|-----------------------|------------------------|-----------------------|------------------------|------------------------|------------------------|------------------------|------------------------|-------------------------|-------------|
| <b>Pre-existing Diabetes</b>         |                       |                        |                        |                        |                       |                        |                       |                        |                        |                        |                        |                        |                         |             |
| <b>Other Population</b>              | 13.9<br>(13.2 - 14.5) | 14.9<br>(14.2 - 15.6)  | 16.3<br>(15.6 - 17.0)  | 15.6<br>(15.0 - 16.3)  | 17.9<br>(17.2 - 18.7) | 18.4<br>(17.7 - 19.1)  | 19.1<br>(18.4 - 19.9) | 19.4<br>(18.6 - 20.1)  | 19.0<br>(18.3 - 19.8)  | 20.0<br>(19.2 - 20.7)  | 20.4<br>(19.6 - 21.2)  | 20.3<br>(19.6 - 21.1)  | 20.5<br>(19.8 - 21.3)   | <.0001      |
| <b>First Nations</b>                 | 52.3<br>(39.6 - 67.9) | 51.9<br>(39.5 - 66.9)  | 45.4<br>(34.1 - 59.4)  | 57.8<br>(44.7 - 73.5)  | 48.3<br>(36.8 - 62.2) | 47.1<br>(36.2 - 60.2)  | 46.7<br>(35.8 - 59.8) | 47.9<br>(36.7 - 61.6)  | 44.0<br>(33.4 - 56.9)  | 56.3<br>(44.6 - 70.2)  | 59.5<br>(47.3 - 73.8)  | 49.8<br>(38.8 - 62.8)  | 40.7<br>(31.1 - 52.2)   | 0.6549      |
| <b>IRR (95% CI)**</b>                | 3.8 (2.9 - 4.9)       | 3.5 (2.7 - 4.5)        | 2.8 (2.1 - 3.7)        | 3.7 (2.9 - 4.7)        | 2.7 (2.1 - 3.5)       | 2.6 (2.0 - 3.3)        | 2.4 (1.9 - 3.1)       | 2.5 (1.9 - 3.2)        | 2.3 (1.8 - 3.0)        | 2.8 (2.3 - 3.5)        | 2.9 (2.3 - 3.6)        | 2.4 (1.9 - 3.1)        | 2.0 (1.5 - 2.6)         |             |
| <b>Gestational Diabetes Mellitus</b> |                       |                        |                        |                        |                       |                        |                       |                        |                        |                        |                        |                        |                         |             |
| <b>Other Population</b>              | 36.6<br>(35.5 - 37.7) | 36.1<br>(35.1 - 37.2)  | 42.3<br>(41.2 - 43.5)  | 43.5<br>(42.3 - 44.6)  | 47.2<br>(46.0 - 48.4) | 46.1<br>(45.0 - 47.3)  | 51.1<br>(49.9 - 52.3) | 54.2<br>(53.0 - 55.5)  | 52.3<br>(51.0 - 53.5)  | 52.3<br>(51.1 - 53.5)  | 55.1<br>(53.8 - 56.4)  | 55.6<br>(54.4 - 56.9)  | 60.7<br>(59.4 - 62.0)   | <.0001      |
| <b>First Nations</b>                 | 80.8<br>(65.3 - 99.0) | 83.8<br>(67.7 - 102.4) | 83.9<br>(68.3 - 102.0) | 92.1<br>(75.9 - 110.8) | 76.2<br>(61.4 - 93.5) | 87.7<br>(73.0 - 104.6) | 68.9<br>(55.8 - 84.2) | 84.7<br>(70.0 - 101.6) | 85.9<br>(71.2 - 102.7) | 85.0<br>(70.5 - 101.6) | 93.2<br>(78.5 - 109.8) | 85.0<br>(70.9 - 101.0) | 108.9<br>(93.3 - 126.2) | 0.0034      |
| <b>IRR (95% CI)*</b>                 | 2.2 (1.8 - 2.7)       | 2.3 (1.9 - 2.8)        | 2.0 (1.6 - 2.4)        | 2.1 (1.8 - 2.6)        | 1.6 (1.3 - 2.0)       | 1.9 (1.6 - 2.3)        | 1.3 (1.1 - 1.7)       | 1.6 (1.3 - 1.9)        | 1.6 (1.4 - 2.0)        | 1.6 (1.4 - 2.0)        | 1.7 (1.4 - 2.0)        | 1.5 (1.3 - 1.8)        | 1.8 (1.5 - 2.1)         |             |

\* Fiscal years (April to March)

\*\* Incidence Risk Ratio: First Nations compared to other Population
